# Supplementary material
Source: publisher figshare collection journal article supplement (https://tandf.figshare.com/ndownloader/files/13262066)
Supplement: Supplementary file 1 [file 13262066]

Maryam Ghasemaghaei is an Assistant Professor of Information Systems at DeGroote School of Business at McMaster University. Her research interests relate to technology adoption, and the use of data analytics in organizations. Her research activities have resulted in over 30 peer-reviewed articles in academic journals, and conference proceedings such as MIS Quarterly, Journal of Strategic Information Systems, Information & Management, Decision Support Systems, Computers in Human Behavior, Journal of Computer Information Systems, Internet Research, Journal of Computer Science, and Journal of Retailing and Consumer Services.

Khaled Hassanein is a Professor of Information Systems, Associate Dean (Graduate Studies & Research), and Director of the McMaster Digital Transformation Research Centre at the DeGroote School of Business, McMaster University. His main research interests lie in the areas of technology adoption, decision support systems including data analytics, and Neuro-Information Systems. His research activities have resulted in over 100 peer-reviewed articles in academic journals, and leading conference proceedings. He is a senior editor, associate editor or editorial board member with several Information Systems' journals. He is a joint holder of several U.S. patents, a senior member of the IEEE and a designated Professional Engineer in Ontario.
